# Supplementary material for: Exploring urine biomarkers of early health effects for occupational exposure to titanium dioxide nanoparticles using metabolomics
Source: Royal Society of Chemistry journal article supplement (doi:10.1039/d0nr08792k), 2021-01-01
Supplement: d0nr08792k1.pdf [file d0nr08792k1.pdf]

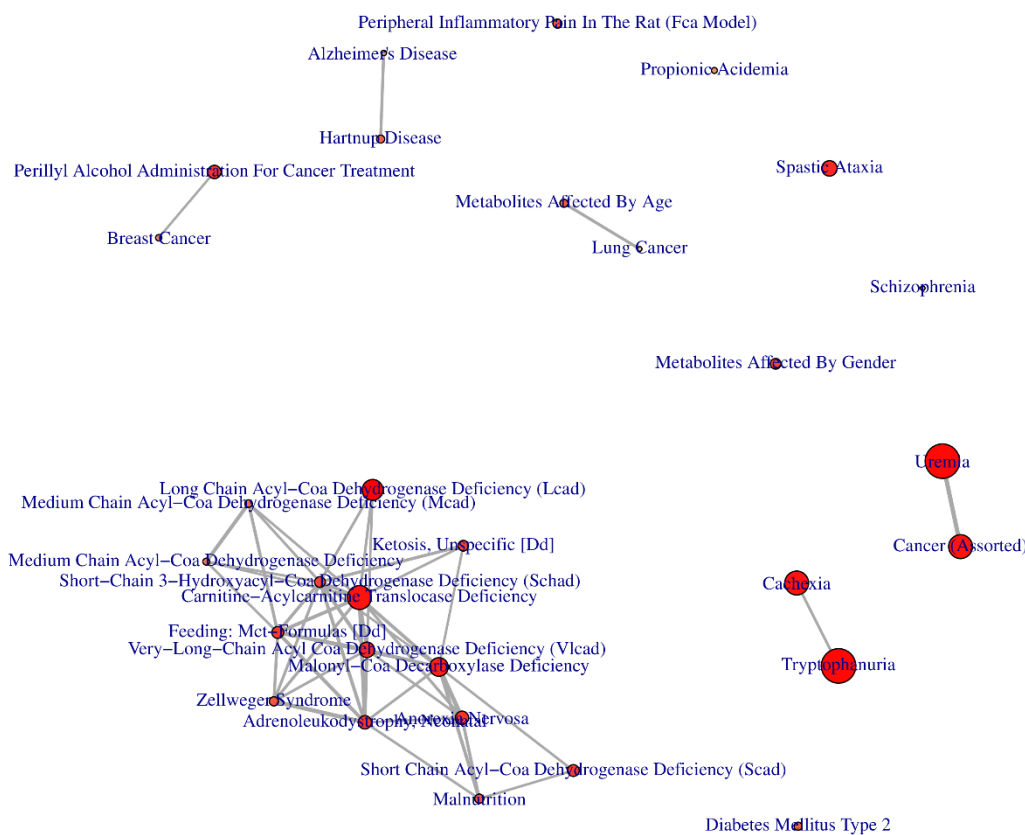

**Figure S1.** The network diagram of the pathway enrichment analysis. Each node represents a metabolic pathway in the database. If 25% or more of the metabolites are shared between the two metabolic pathways, then there will be a gray line connecting the two metabolic pathways. The thicker the connecting line, the larger the proportion of shared metabolites. The color of the node reflects the P value of the pathway enrichment analysis. The smaller P value, the darker color of the node. The size of the node reflects the Fold Change of the pathway. The network diagram can provide a systematic perspective on the overall impact of differential metabolites from metabolomics.

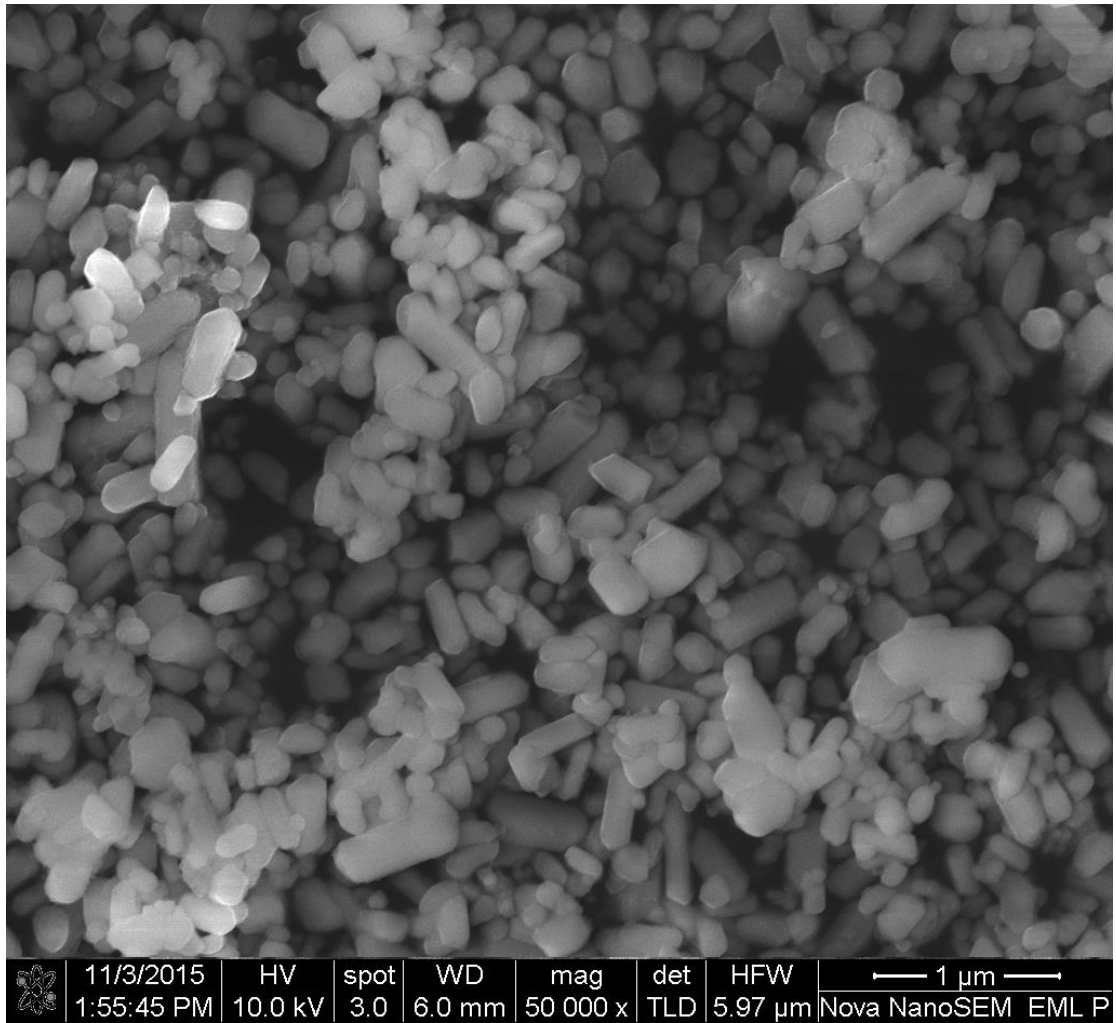

**Figure S2.** Scanning electron microscope (SEM) image of TiO<sub>2</sub> particles.

**Table S1.** Differential metabolites in urine between the TiO<sub>2</sub> NPs exposure group and the control group.

| No. | Metabolite                                                                 | Class                               | P value  | FDR      | log <sub>2</sub> Fold Change | VIP  |
|-----|----------------------------------------------------------------------------|-------------------------------------|----------|----------|------------------------------|------|
| 1   | (S)-5,7-Dihydroxy-6-prenylflavanone                                        | Flavonoids                          | 4.60E-16 | 9.47E-15 | 1.58                         | 2.04 |
| 2   | (Z)-3-(1-Butenyl)-1H-2-benzopyran-1-one                                    | Isocoumarins and derivatives        | 2.61E-14 | 2.59E-13 | -2.66                        | 2.15 |
| 3   | 1-Methoxy-1-(2,4,5-trimethoxyphenyl)-2-propanol                            | Benzene and substituted derivatives | 7.40E-18 | 7.08E-16 | 1.16                         | 2.10 |
| 4   | 1-Methylguanosine                                                          | Purine nucleosides                  | 2.93E-15 | 4.18E-14 | -2.77                        | 2.03 |
| 5   | 1-Methylinosine                                                            | Purine nucleosides                  | 9.71E-16 | 1.74E-14 | 1.69                         | 2.15 |
| 6   | 1,2,10-Trihydroxydihydro-trans-linalyl oxide<br>7-O-beta-D-glucopyranoside | Organooxygen compounds              | 3.27E-15 | 4.55E-14 | 1.51                         | 2.06 |
| 7   | 2',4'-Dihydroxy-7-methoxy-8-prenylflavan                                   | Flavonoids                          | 8.02E-17 | 2.85E-15 | -3.26                        | 2.07 |
| 8   | 2-Octenedioic acid                                                         | Fatty Acyls                         | 1.55E-12 | 8.56E-12 | -3.29                        | 2.15 |
| 9   | 3-Oxooctanoic acid glycerides                                              | Unknown                             | 3.13E-13 | 2.11E-12 | -3.78                        | 2.15 |
| 10  | 4-Hydroxycitrulline                                                        | Carboxylic acids and derivatives    | 1.97E-14 | 2.07E-13 | -3.10                        | 2.13 |
| 11  | 5-Methoxytryptophol                                                        | Indoles and derivatives             | 6.45E-20 | 3.36E-17 | 1.58                         | 2.14 |
| 12  | 6-O-Acetylaustroinulin                                                     | Prenol lipids                       | 8.34E-17 | 2.91E-15 | -3.40                        | 2.15 |
| 13  | 7-(4-Hydroxyphenyl)-1-phenyl-4-hepten-3-one                                | Diarylheptanoids                    | 4.27E-14 | 3.86E-13 | -2.55                        | 2.26 |
| 14  | 7-beta-D-Glucopyranosyloxybutylidenephthalide                              | Organooxygen compounds              | 2.62E-16 | 6.36E-15 | -2.71                        | 2.14 |
| 15  | Acetylcholine                                                              | Organonitrogen compounds            | 3.84E-14 | 3.55E-13 | -2.59                        | 2.10 |
| 16  | Adenylsuccinic acid                                                        | Purine nucleotides                  | 8.67E-15 | 1.05E-13 | 1.72                         | 2.02 |
| 17  | Amisulpride                                                                | Benzene and substituted derivatives | 3.42E-19 | 6.80E-17 | 0.88                         | 2.03 |
| 18  | Ampicillin                                                                 | Lactams                             | 3.28E-19 | 6.80E-17 | 1.64                         | 2.14 |
| 19  | Arginyl-Proline                                                            | Carboxylic acids and derivatives    | 3.56E-17 | 1.70E-15 | -2.40                        | 2.04 |
| 20  | Bacampicillin                                                              | Lactams                             | 3.33E-18 | 3.67E-16 | 1.16                         | 2.07 |
| 21  | Carteolol                                                                  | Quinolines and derivatives          | 1.75E-15 | 2.74E-14 | -2.05                        | 2.14 |
| 22  | Carvedilol                                                                 | Indoles and derivatives             | 1.66E-16 | 4.62E-15 | -2.98                        | 2.12 |
| 23  | CDP-glucose                                                                | Pyrimidine nucleotides              | 1.22E-16 | 3.96E-15 | 1.54                         | 2.01 |
| 24  | Cysteinyl-Valine                                                           | Carboxylic acids and derivatives    | 2.34E-20 | 3.36E-17 | 1.92                         | 2.35 |
| 25  | D-Fructosazine                                                             | Diazines                            | 5.83E-15 | 7.42E-14 | -2.64                        | 2.01 |
| 26  | Dibenzyl ether                                                             | Benzene and substituted derivatives | 1.16E-19 | 4.10E-17 | 1.54                         | 2.07 |
| 27  | Dihydrodioscorine                                                          | Azaspirodecane derivatives          | 4.11E-16 | 8.79E-15 | -2.93                        | 2.25 |
| 28  | Dihydropteridine                                                           | Pteridines and derivatives          | 7.02E-20 | 3.36E-17 | 1.20                         | 2.16 |
| 29  | Famciclovir                                                                | Imidazopyrimidines                  | 1.05E-15 | 1.83E-14 | -3.08                        | 2.05 |
| 30  | Galactosyl 4-hydroxyproline                                                | Carboxylic acids and derivatives    | 2.23E-17 | 1.29E-15 | 1.63                         | 2.09 |

**Table S1.** Differential metabolites in urine between the TiO<sub>2</sub> NPs exposure group and the control group. (**Continued**)

| No. | Metabolite                                           | Class                                  | P value  | FDR      | log <sub>2</sub> Fold Change | VIP  |
|-----|------------------------------------------------------|----------------------------------------|----------|----------|------------------------------|------|
| 31  | gamma-L-Glutamyl-L-pipecolic acid                    | Carboxylic acids and derivatives       | 2.72E-16 | 6.36E-15 | 1.42                         | 2.07 |
| 32  | Glutaminy-Lysine                                     | Carboxylic acids and derivatives       | 6.13E-17 | 2.33E-15 | -3.11                        | 2.22 |
| 33  | Glutamyl-Phenylalanine                               | Carboxylic acids and derivatives       | 3.56E-17 | 1.70E-15 | 1.49                         | 2.09 |
| 34  | Ipomeatetrahydrofuran                                | Prenol lipids                          | 1.60E-16 | 4.62E-15 | -3.00                        | 2.14 |
| 35  | Isosorbide Mononitrate                               | Furofurans                             | 2.93E-17 | 1.61E-15 | 1.78                         | 2.11 |
| 36  | L-Carnitine                                          | Organonitrogen compounds               | 9.71E-16 | 1.74E-14 | -3.64                        | 2.21 |
| 37  | Tryptophan                                           | Amino Acids                            | 6.07E-18 | 6.07E-16 | -2.34                        | 2.05 |
| 38  | Lipoamide                                            | Dithiolanes                            | 7.64E-20 | 3.36E-17 | -3.22                        | 2.21 |
| 39  | Marshrin                                             | Coumarins and derivatives              | 1.27E-18 | 1.74E-16 | 1.32                         | 2.09 |
| 40  | Methyl 3,4-dihydroxy-5-prenylbenzoate<br>3-glucoside | Tannins                                | 5.35E-16 | 1.06E-14 | -3.33                        | 2.20 |
| 41  | Methylguanidine                                      | Organonitrogen compounds               | 9.35E-16 | 1.72E-14 | -2.51                        | 2.12 |
| 42  | Musanolone F                                         | Naphthalenes                           | 1.49E-19 | 4.10E-17 | 1.62                         | 2.26 |
| 43  | Myrigalone A                                         | Prenol lipids                          | 1.49E-19 | 4.10E-17 | 1.46                         | 2.07 |
| 44  | N-(3-Methylbutyl)acetamide                           | Carboxylic acids and derivatives       | 1.27E-16 | 4.00E-15 | -3.20                        | 2.09 |
| 45  | N-Carboxyethyl-g-aminobutyric acid                   | Carboxylic acids and derivatives       | 1.43E-16 | 4.24E-15 | -3.42                        | 2.17 |
| 46  | Norspermidine                                        | Organonitrogen compounds               | 6.21E-16 | 1.18E-14 | -3.73                        | 2.27 |
| 47  | p-Octopamine                                         | Phenols                                | 1.27E-18 | 1.74E-16 | 1.87                         | 2.29 |
| 48  | Pandamarilactonine A                                 | Dihydrofurans                          | 1.98E-17 | 1.28E-15 | 0.97                         | 2.01 |
| 49  | Phenylalanyl-Histidine                               | Carboxylic acids and derivatives       | 1.09E-13 | 8.55E-13 | -1.36                        | 2.01 |
| 50  | Prasugrel                                            | Thienopyridines                        | 4.21E-15 | 5.65E-14 | -2.32                        | 2.16 |
| 51  | Prolylhydroxyproline                                 | Carboxylic acids and derivatives       | 4.53E-15 | 5.97E-14 | -3.06                        | 2.04 |
| 52  | Quassamarin                                          | Prenol lipids                          | 2.67E-19 | 6.52E-17 | 1.36                         | 2.11 |
| 53  | Romucosine H                                         | Aporphines                             | 1.08E-18 | 1.69E-16 | 1.65                         | 2.23 |
| 54  | Sinigrin                                             | Organooxygen compounds                 | 9.03E-18 | 7.64E-16 | 1.50                         | 2.07 |
| 55  | Suberic acid                                         | Fatty Acids                            | 4.27E-16 | 8.95E-15 | -3.89                        | 2.31 |
| 56  | Tridecyl phloretate                                  | Fatty Acyls                            | 4.00E-17 | 1.80E-15 | -3.53                        | 2.26 |
| 57  | Valaciclovir                                         | Carboxylic acids and derivatives       | 6.13E-13 | 3.85E-12 | -3.37                        | 2.16 |
| 58  | Xylometazoline                                       | Benzene and substituted<br>derivatives | 1.66E-16 | 4.62E-15 | -3.11                        | 2.08 |
| 59  | Yangonin                                             | Kavalactones                           | 2.14E-18 | 2.58E-16 | 1.37                         | 2.15 |
| 60  | Zalcitabine                                          | Pyrimidine nucleosides                 | 2.23E-18 | 2.58E-16 | 1.87                         | 2.18 |
